# Supplementary material
Source: publisher figshare collection journal article supplement (https://geolsoc.figshare.com/ndownloader/files/30841430)
Supplement: Supplementary file 1 [file 30841430]

## Sheet: Sheet1
Table S2: Sample properties at specific steps of bulk mount preparation. Note the comparison of volume between thin-sections and thin-section billets.
	thin-sections		bulk mounts
			thin-section billets before selfrag						After selfrag	Heavy 2.8	Light 2.8
Sample ID	Depth [mm]	Volume [mm3]	Length [mm]	Width [mm]	Depth [mm]	Volume [mm3]	Weight [g]	Desity [g/cm3]	Weight [g]	Weight [g]	Weight [g]
TR-3	0.03	21.3273	38.18	18.62	10.88	7734.72	15.39	1.98973	7.69	7.58	0.12
TR-8	0.03	20.0046	36.26	18.39	12.45	8301.93	17.47	2.10433	11.16	10.85	0.37
TR-12	0.03	23.038	38.32	20.04	12.79	9821.86	17.57	1.78887	11.9	12.37	0.15
TR-14	0.03	15.1674	28.01	18.05	10.58	5349.04	10.5	1.96297	4.9	4.88	0.05
TR-18	0.03	27.4641	47.36	19.33	10.2	9337.78	17.58	1.88267	11.61	11.47	0.14
TR-21	0.03	23.158	37.13	20.79	13.23	10212.7	25.17	2.46459	11.35	6.14	4.04
TR-23	0.03	14.8104	20.57	24	7.44	3672.98	7.58	2.06372	2.62	2.14	0.36
TR-24	0.03	11.758	22.8	17.19	10.05	3938.92	7.71	1.95739	3.98	3.65	0.1
TR-27	0.03	21.2622	37.01	19.15	8	5669.93	13.36	2.35629	9.11	6.7	1.31
TR-30	0.03	21.6226	34.42	20.94	7.97	5744.42	6.58	1.14546	3.75	3.72	0.17
TR-31	0.03	21.5789	44.21	16.27	6.82	4905.6	8.24	1.67971	3.48	3.2	0.26
TR-51	0.03	17.8292	29.76	19.97	12.11	7197.06	10.51	1.46032	6.86	6.81	0.05
TR-52	0.03	25.7499	43.57	19.7	14.84	12737.6	25.62	2.01137	22.12	22.09	0.12
TR-60A	0.03	23.2499	39.34	19.7	8.71	6750.23	16.42	2.43251	10.15	10.17	0.13
TR-60B	0.03	16.008	26.68	20	5.23	2790.73	4.6	1.64832	1.7	1.79	0.06
TR-61	0.03	21.7453	37.93	19.11	10.6	7683.33	17.6	2.29067	9.3	9.34	0.04
